# Supplementary material
Source: ML conference proceedings conference paper supplement (https://openreview.net/forum?id=QOp4bYWpJQ)

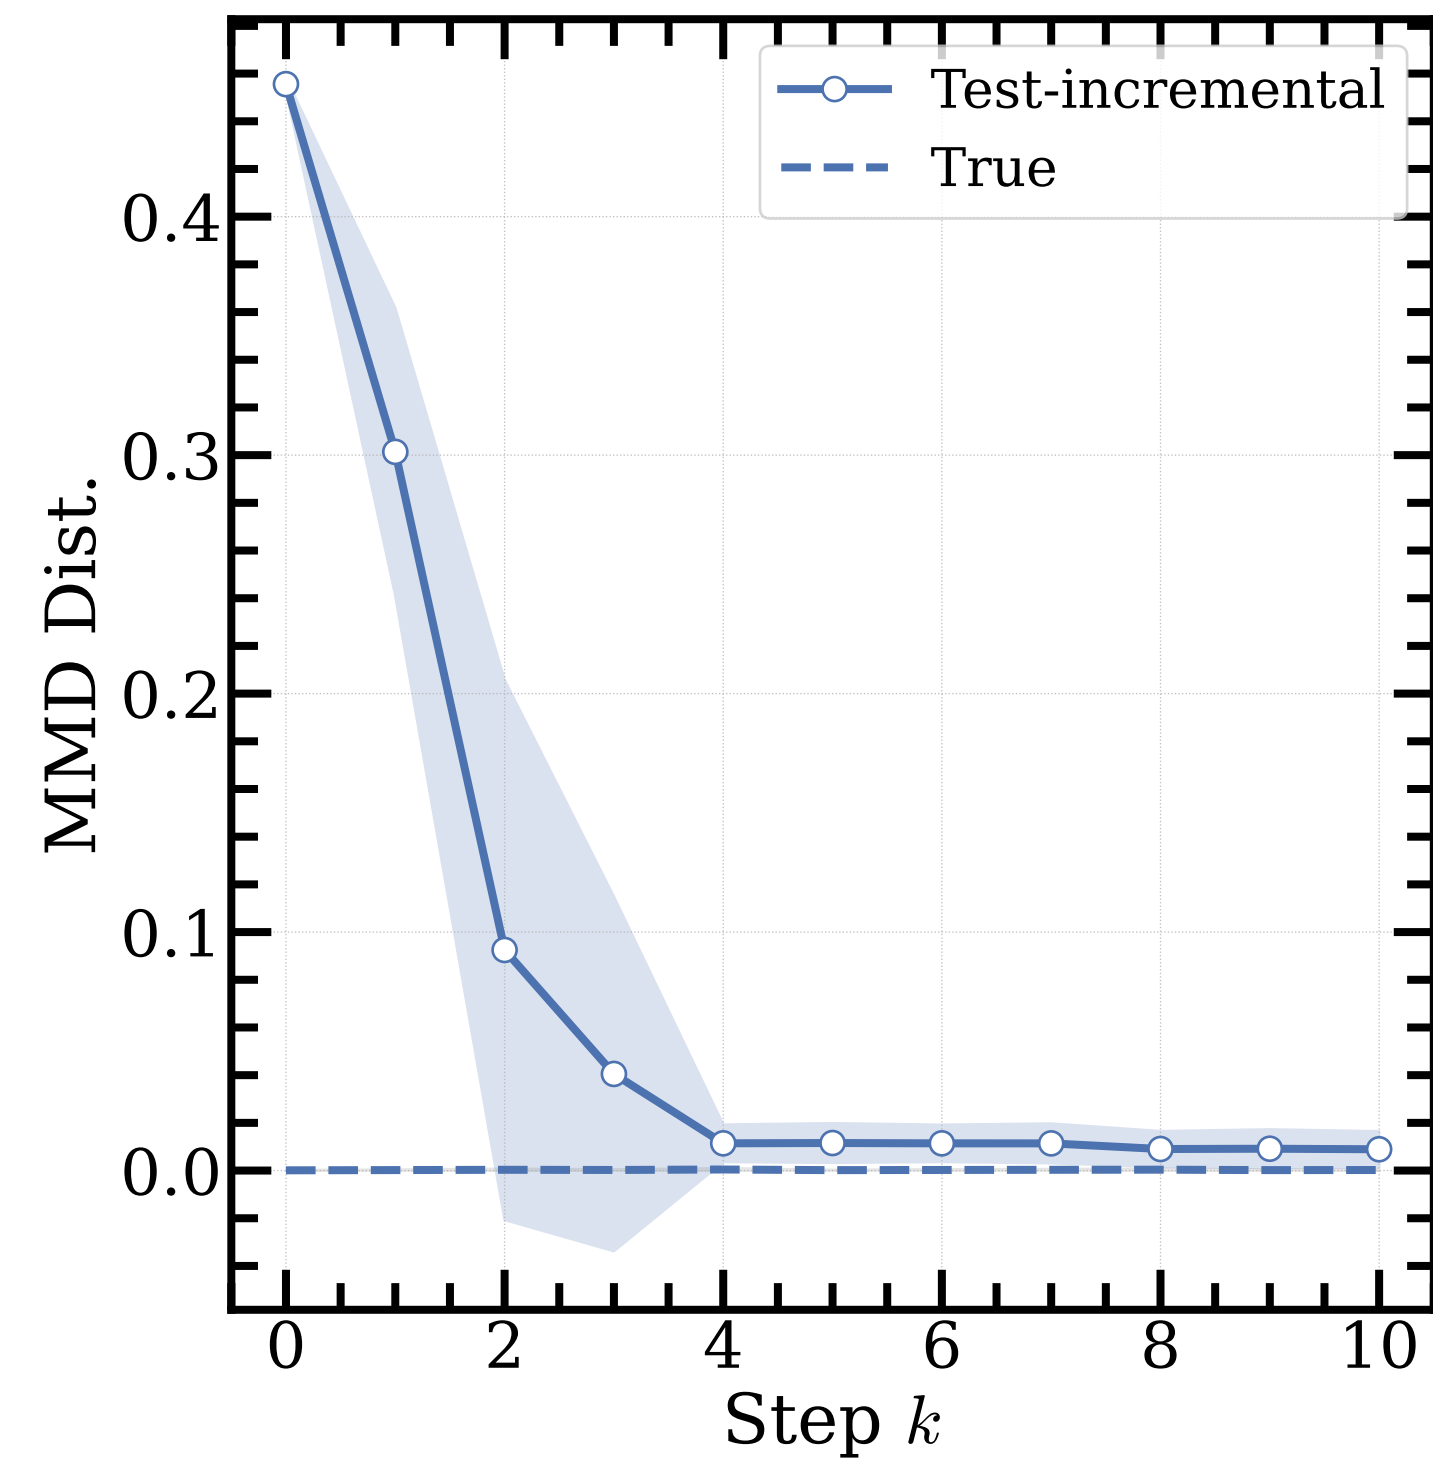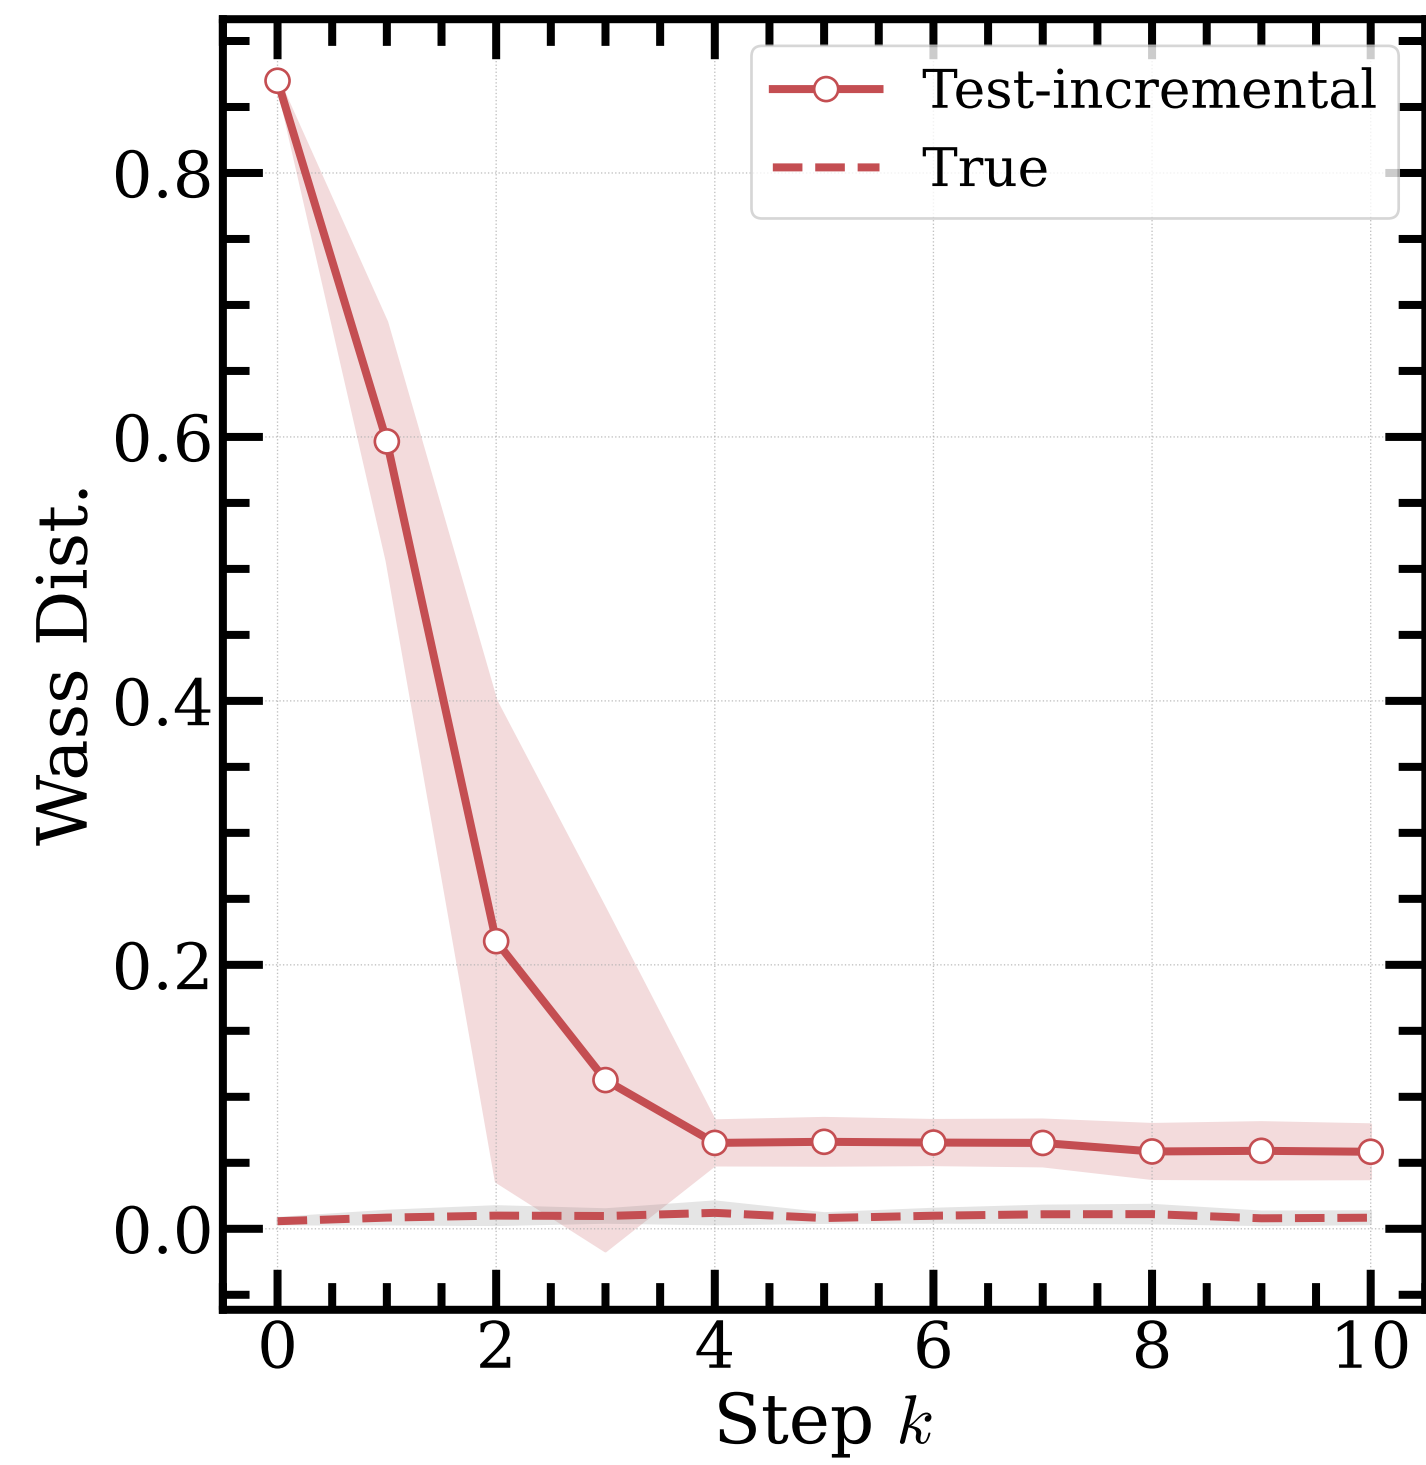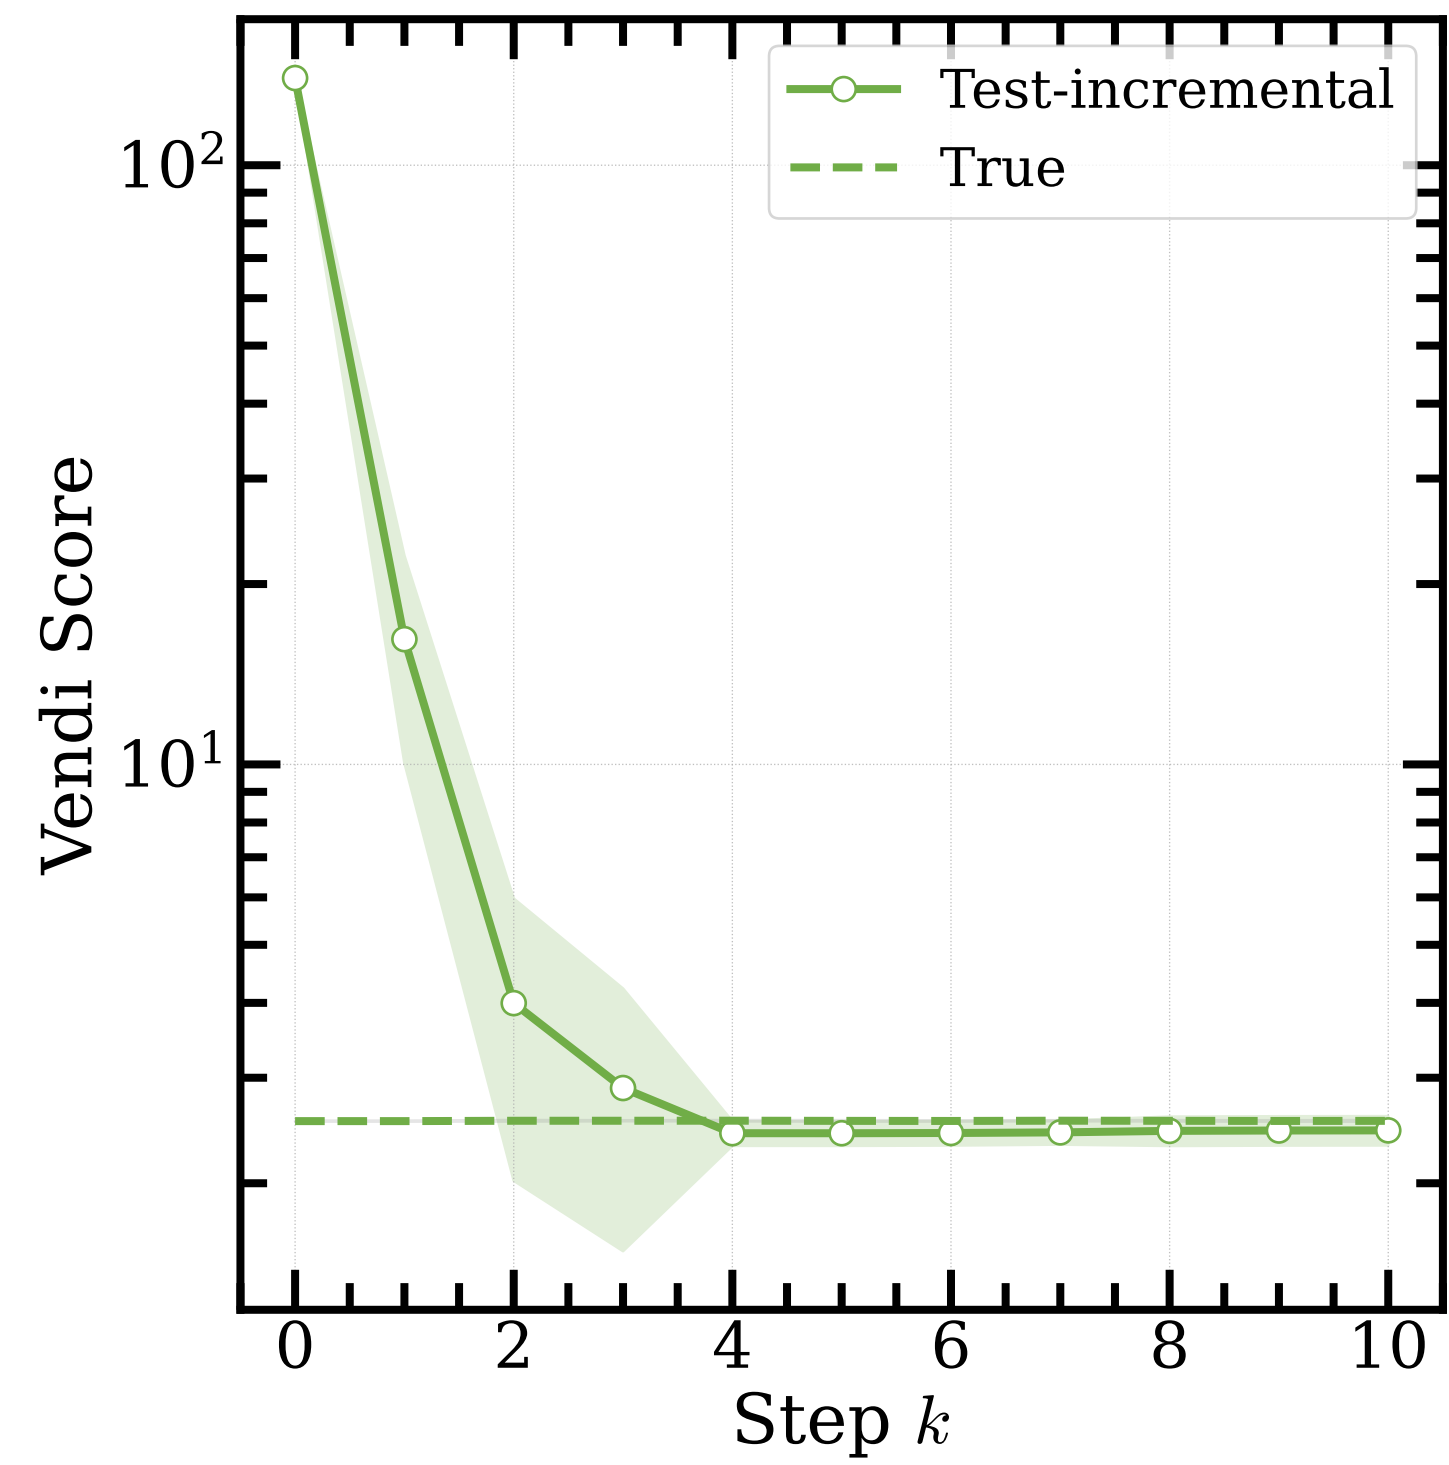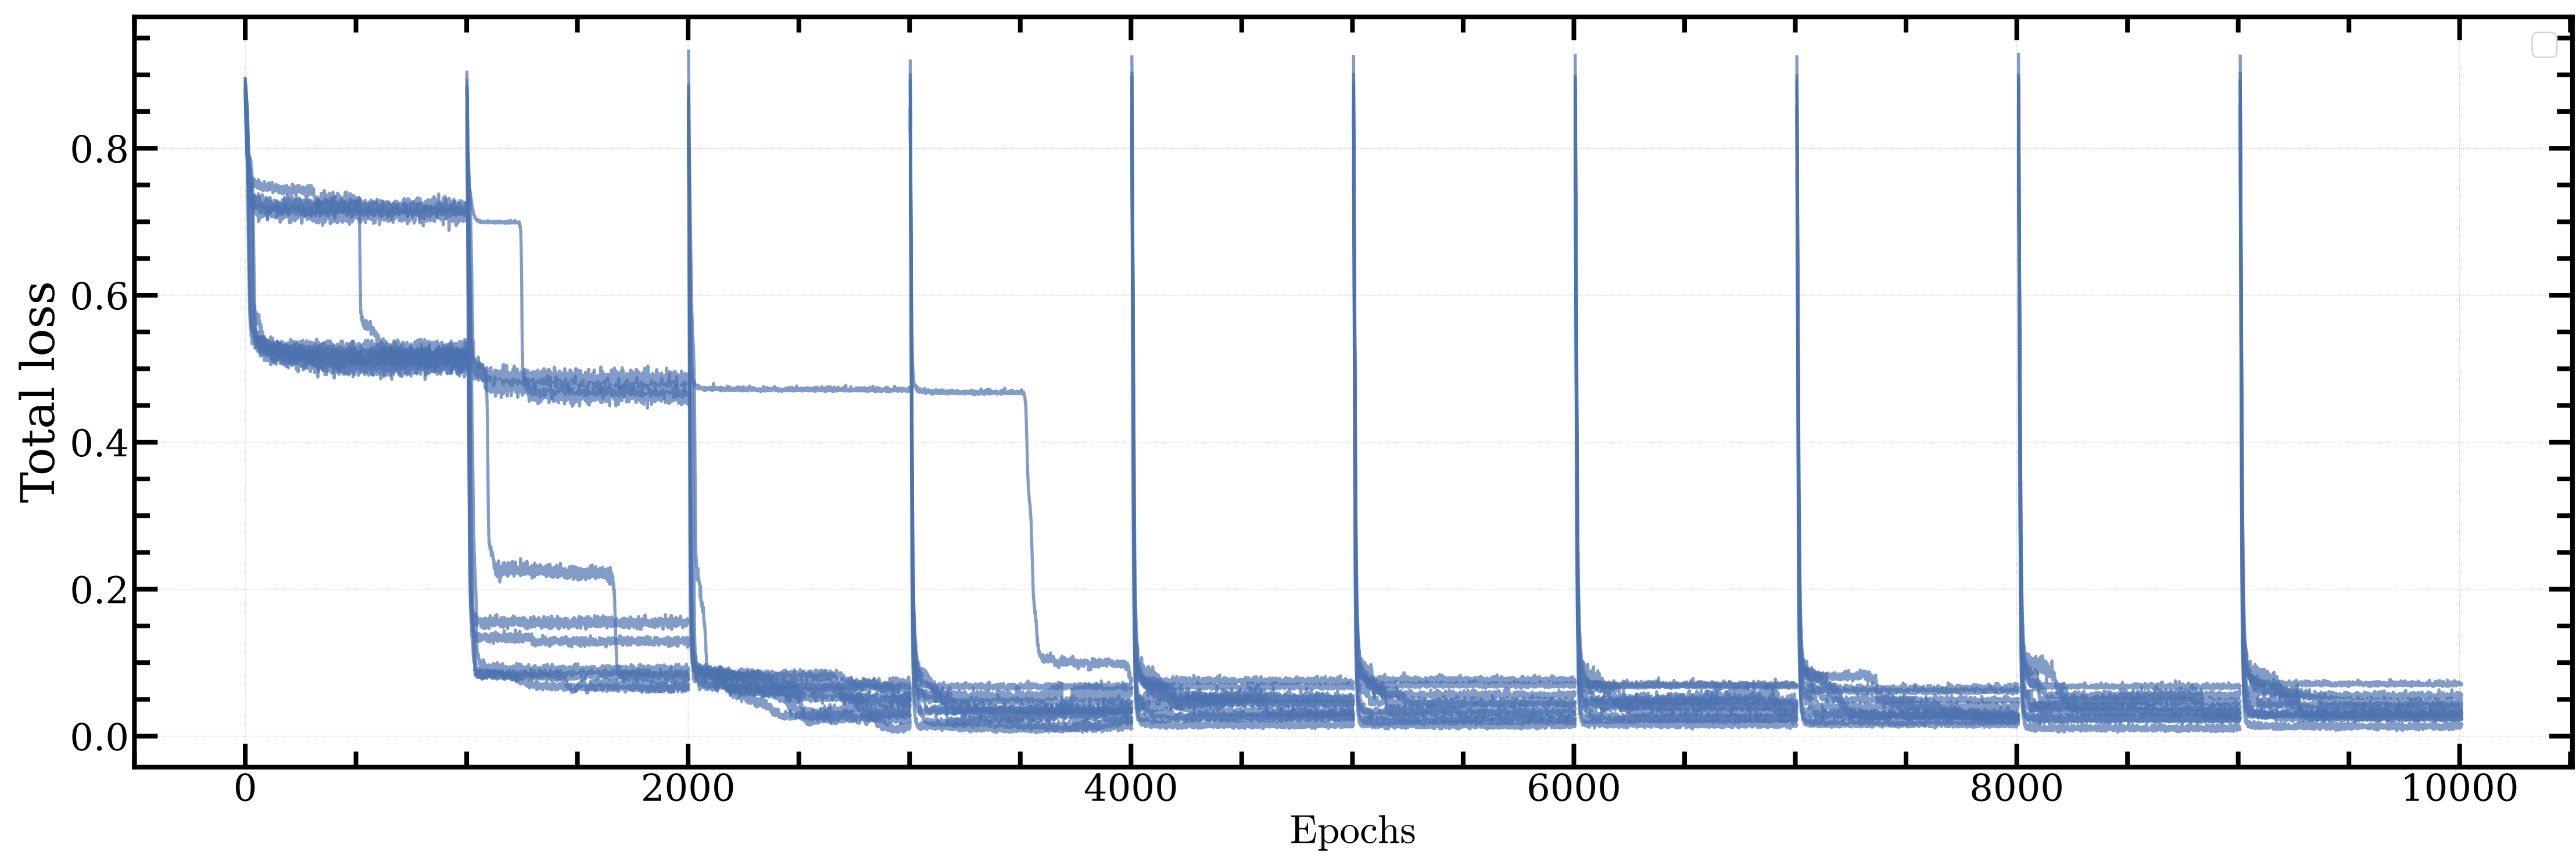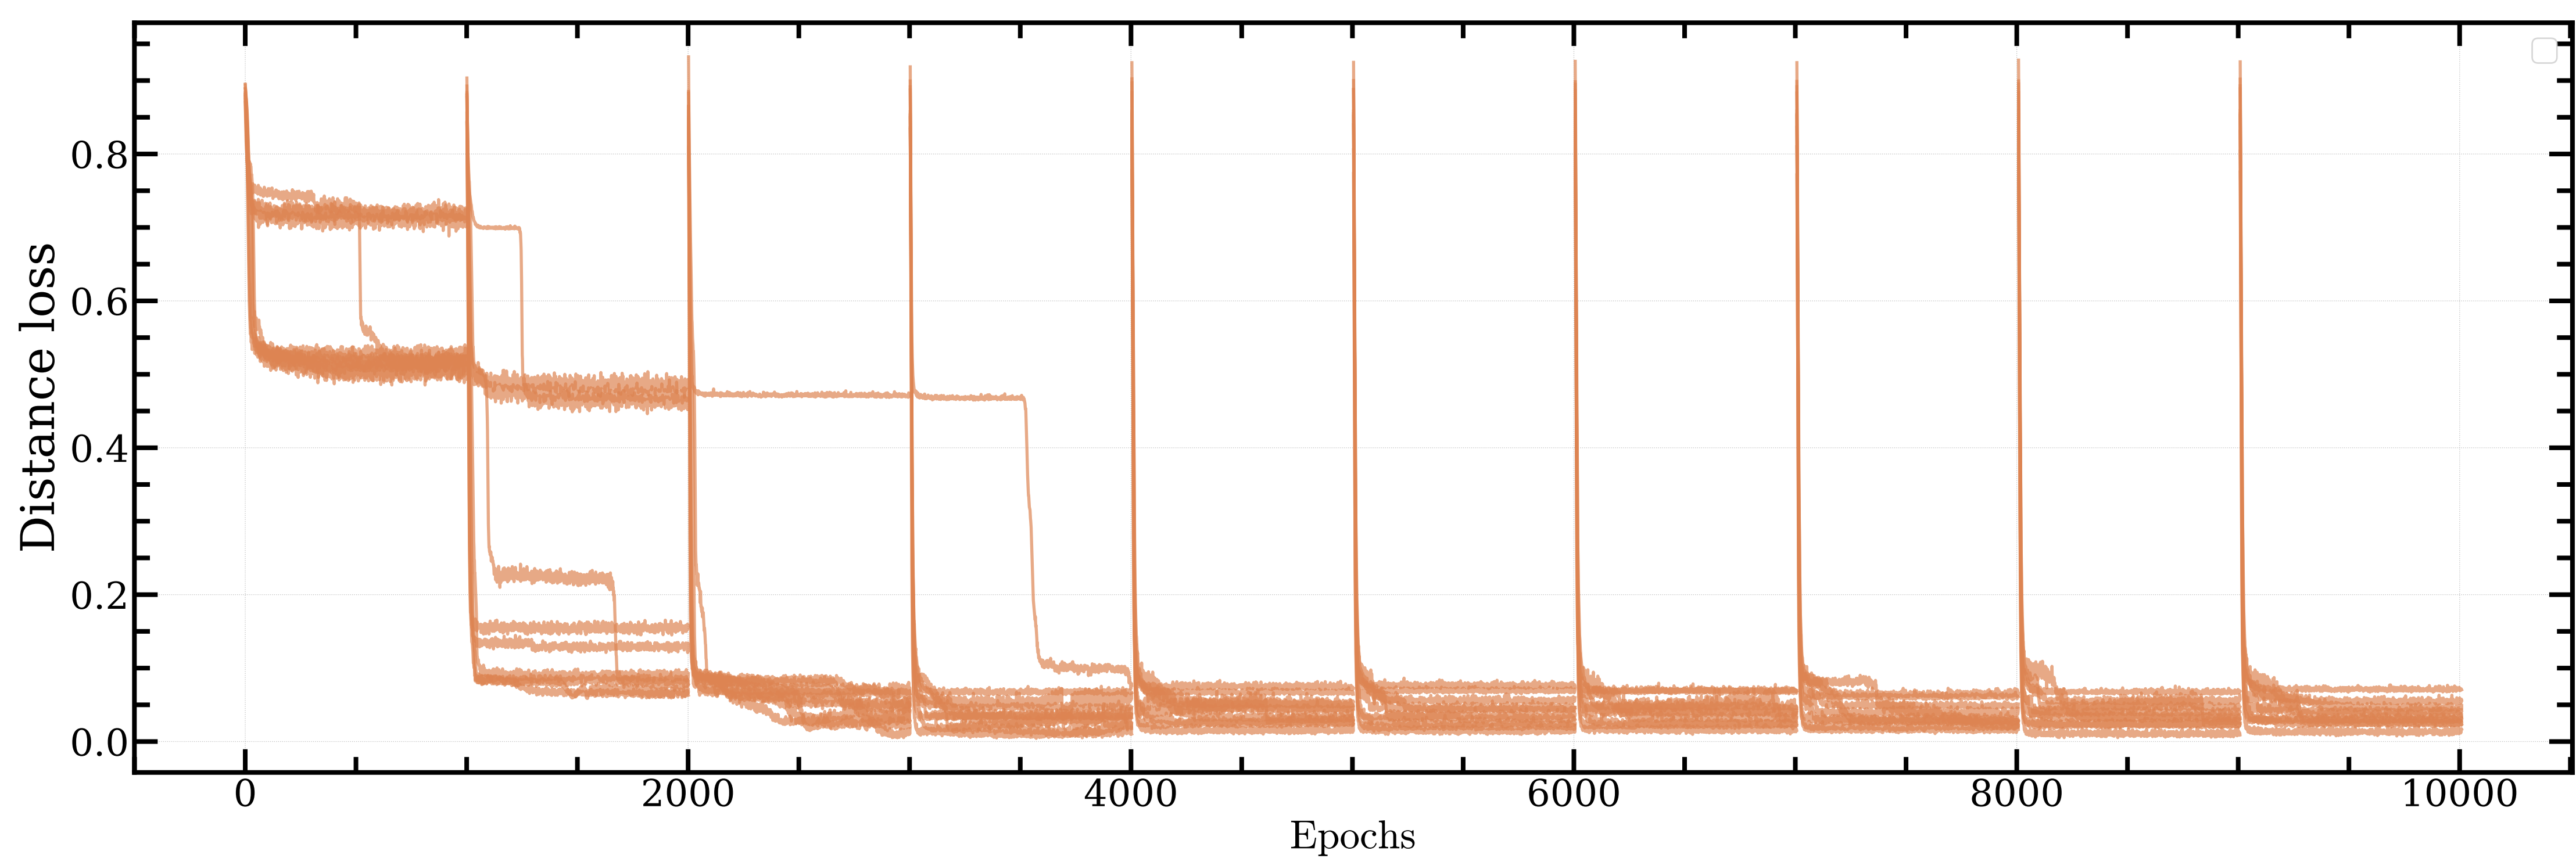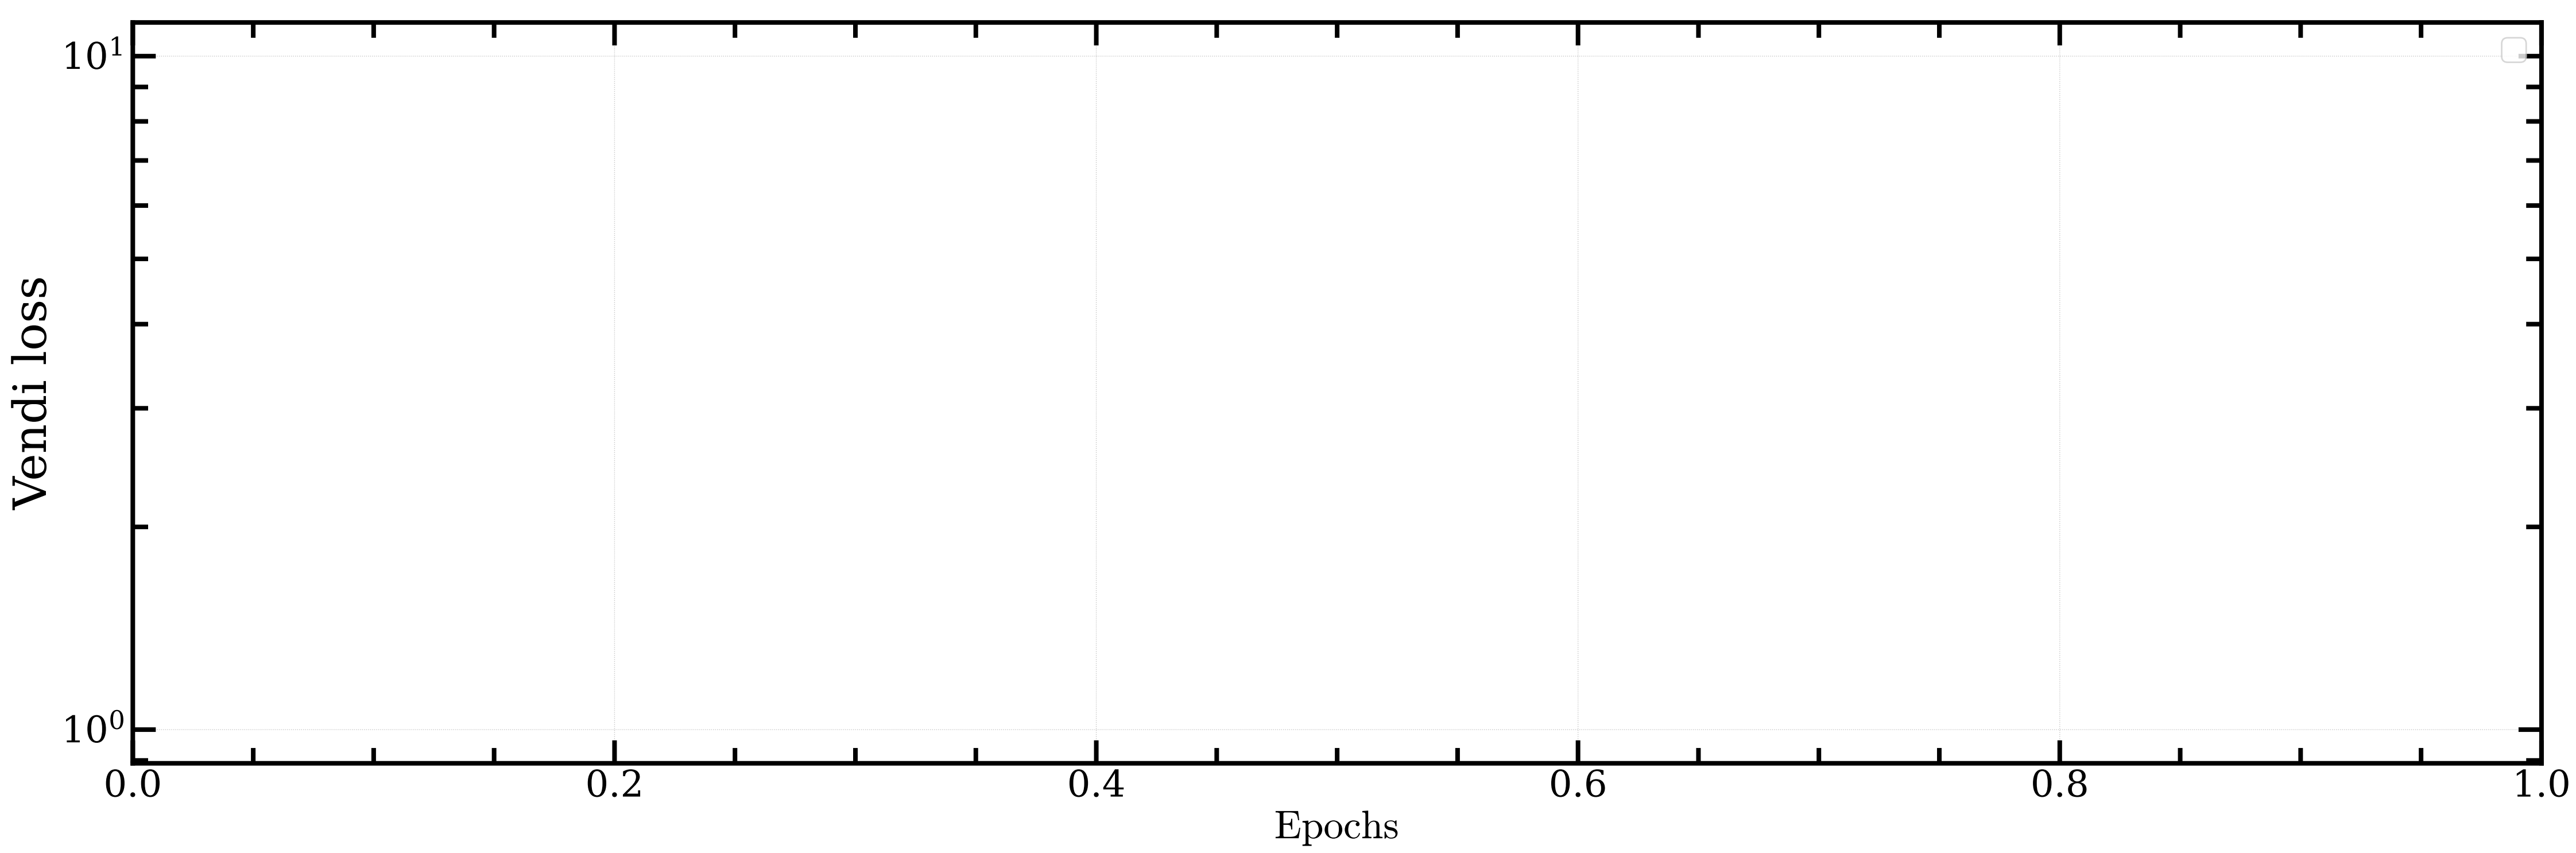

Supplement: supplementary_material [file eval_loss_multi_cluster_ryzcz_qubits_4_2_steps_10_wass_lays_10_in_product_dat_1000_3000_epoch_1001_100_lr_0.001_init_1.0_vd_0.0.pdf › mpe_uap/results/demo_train_multi_cluster/multi_cluster_qubits_4_2_dat_3000_1000/figs_diff/eval_loss_multi_cluster_ryzcz_qubits_4_2_steps_10_wass_lays_10_in_product_dat_1000_3000_epoch_1001_100_lr_0.001_init_1.0_vd_0.0.pdf]

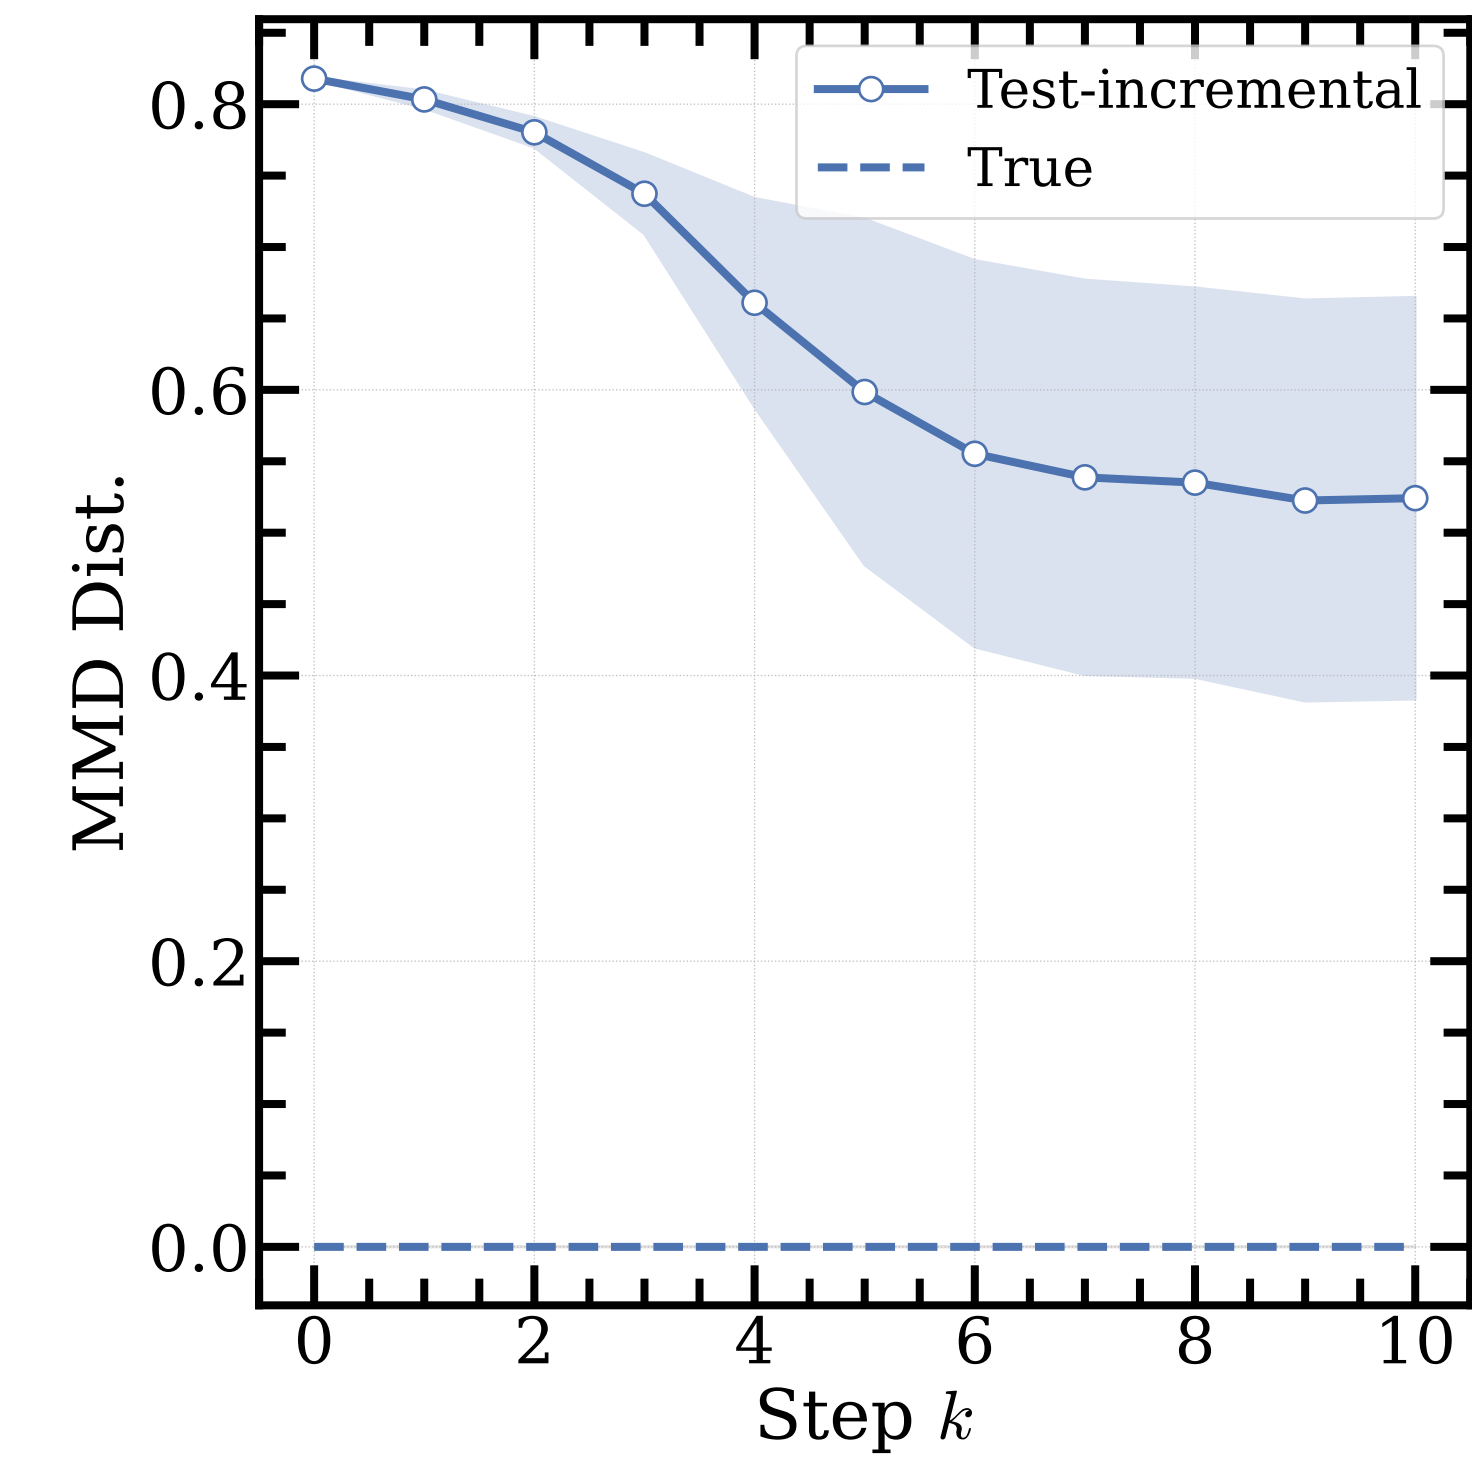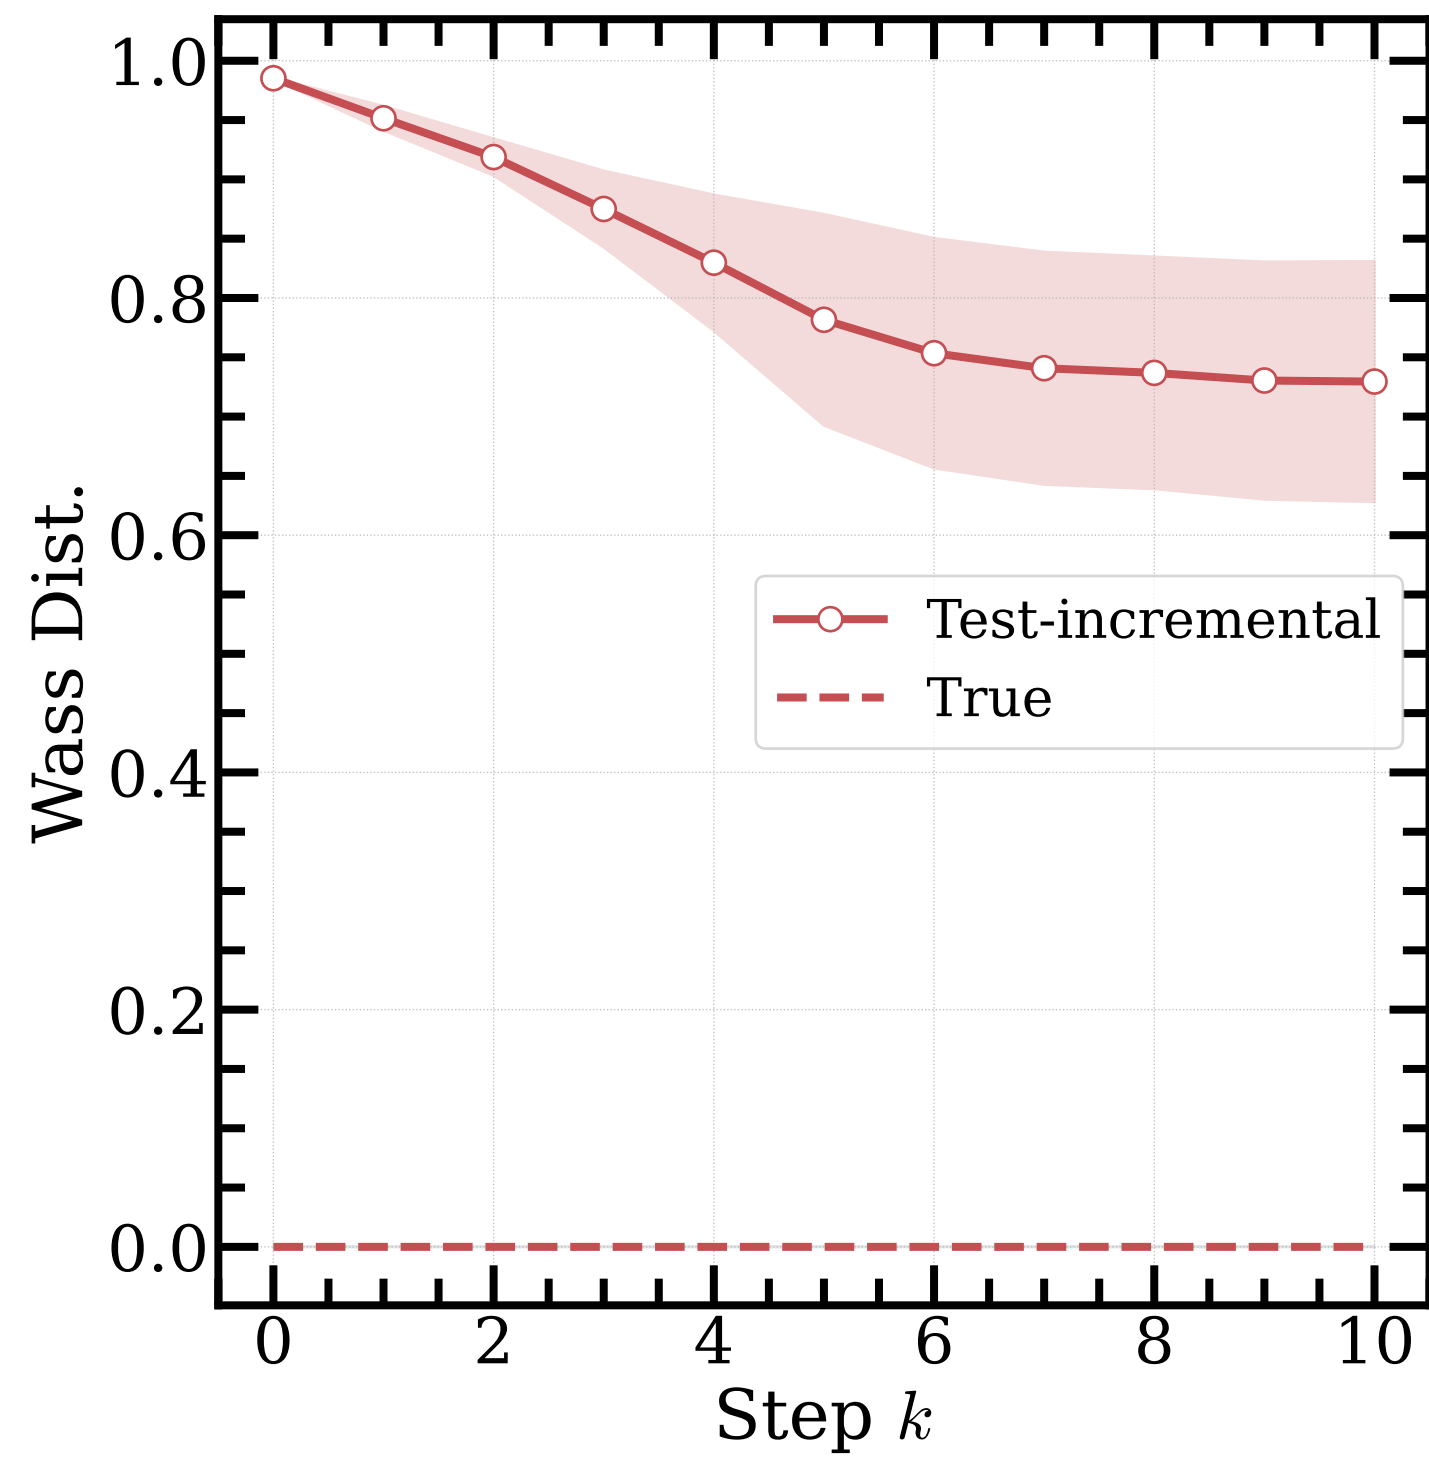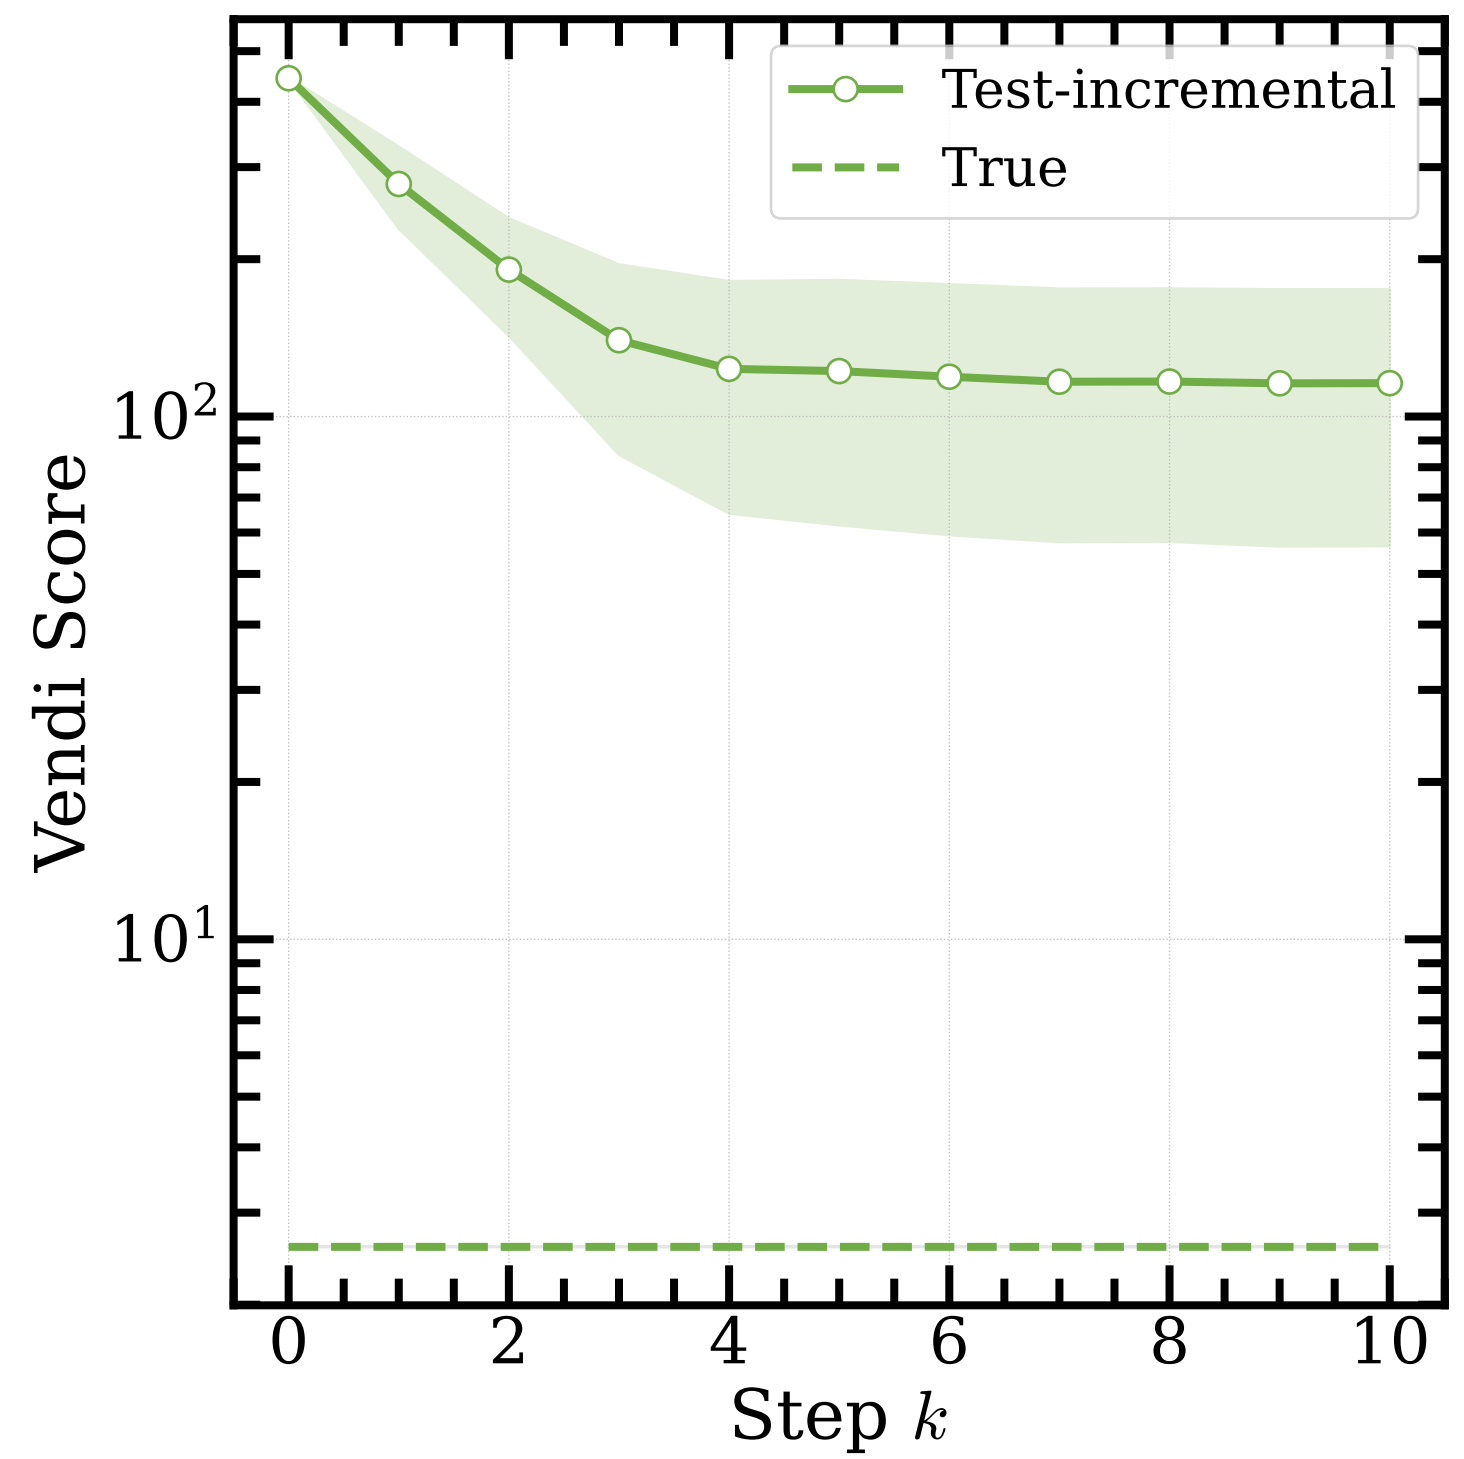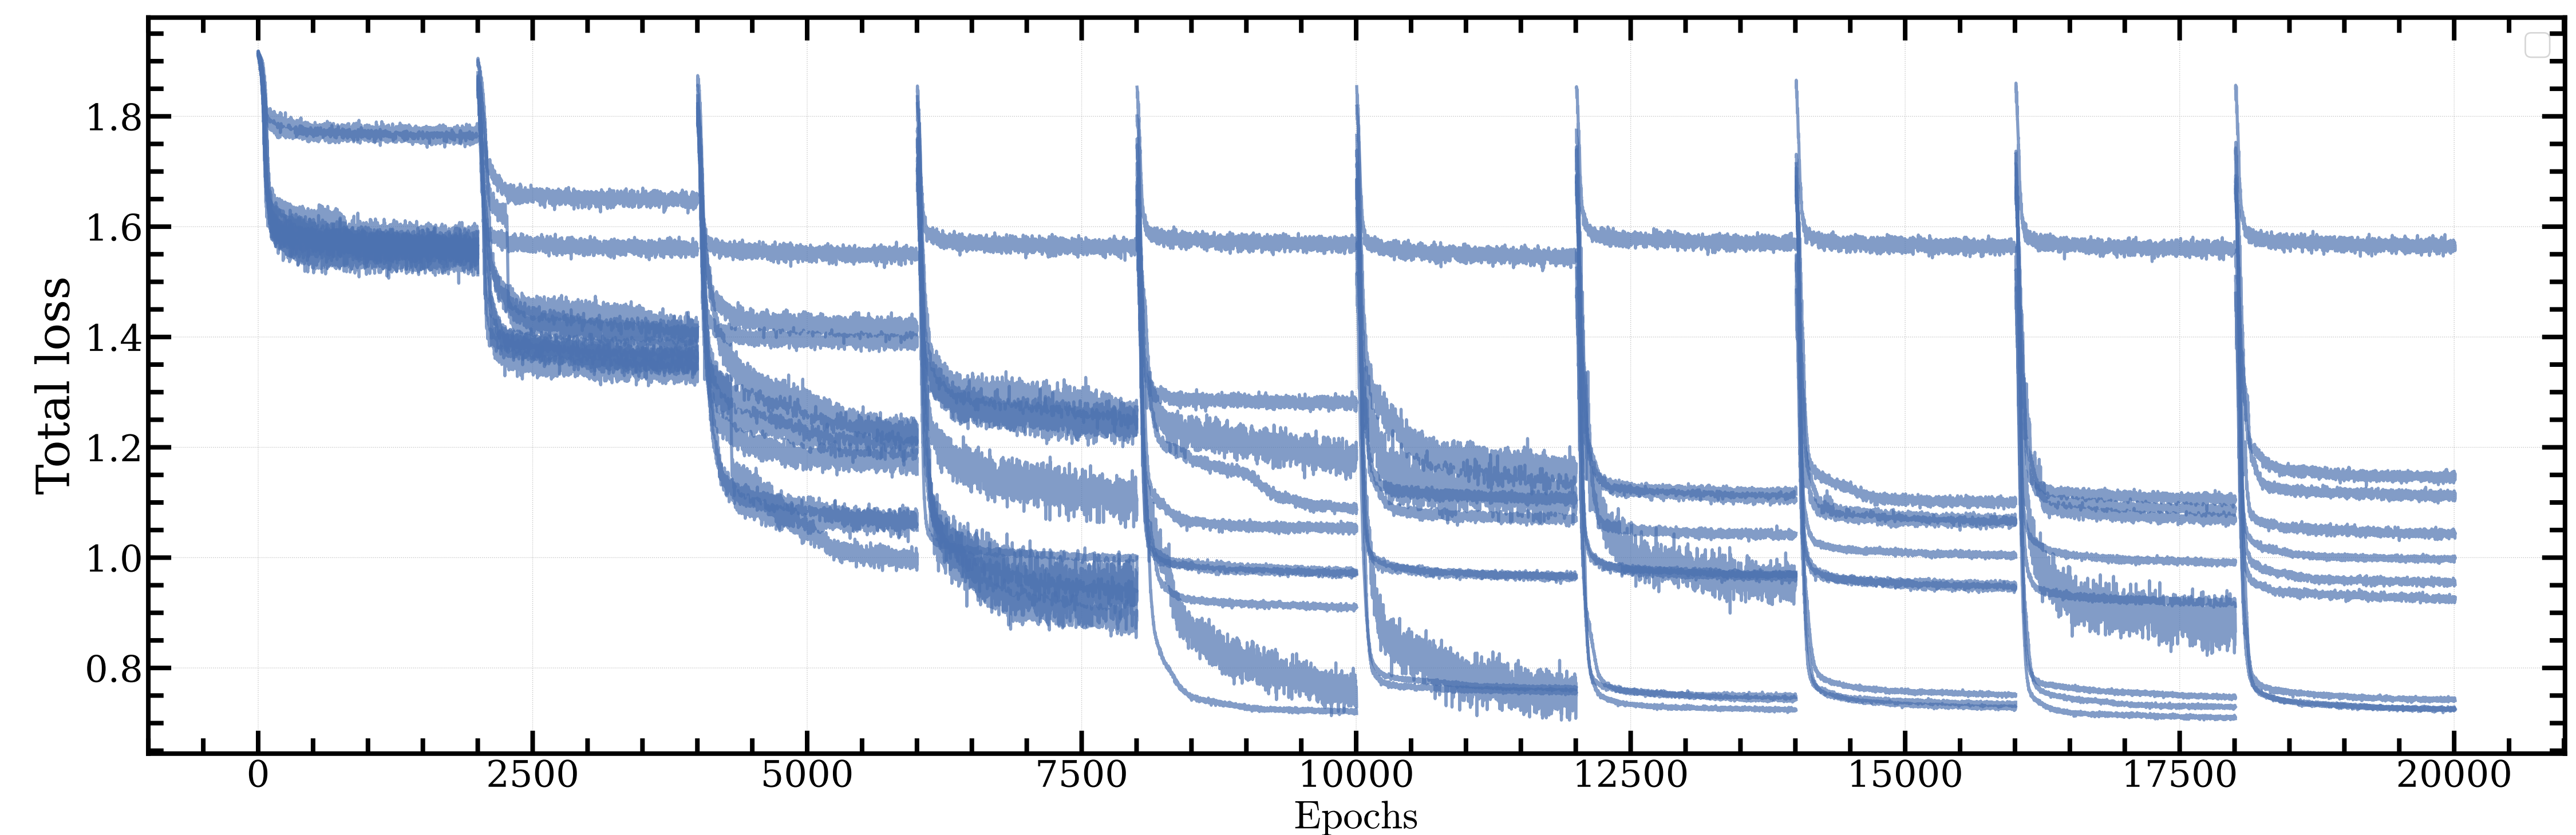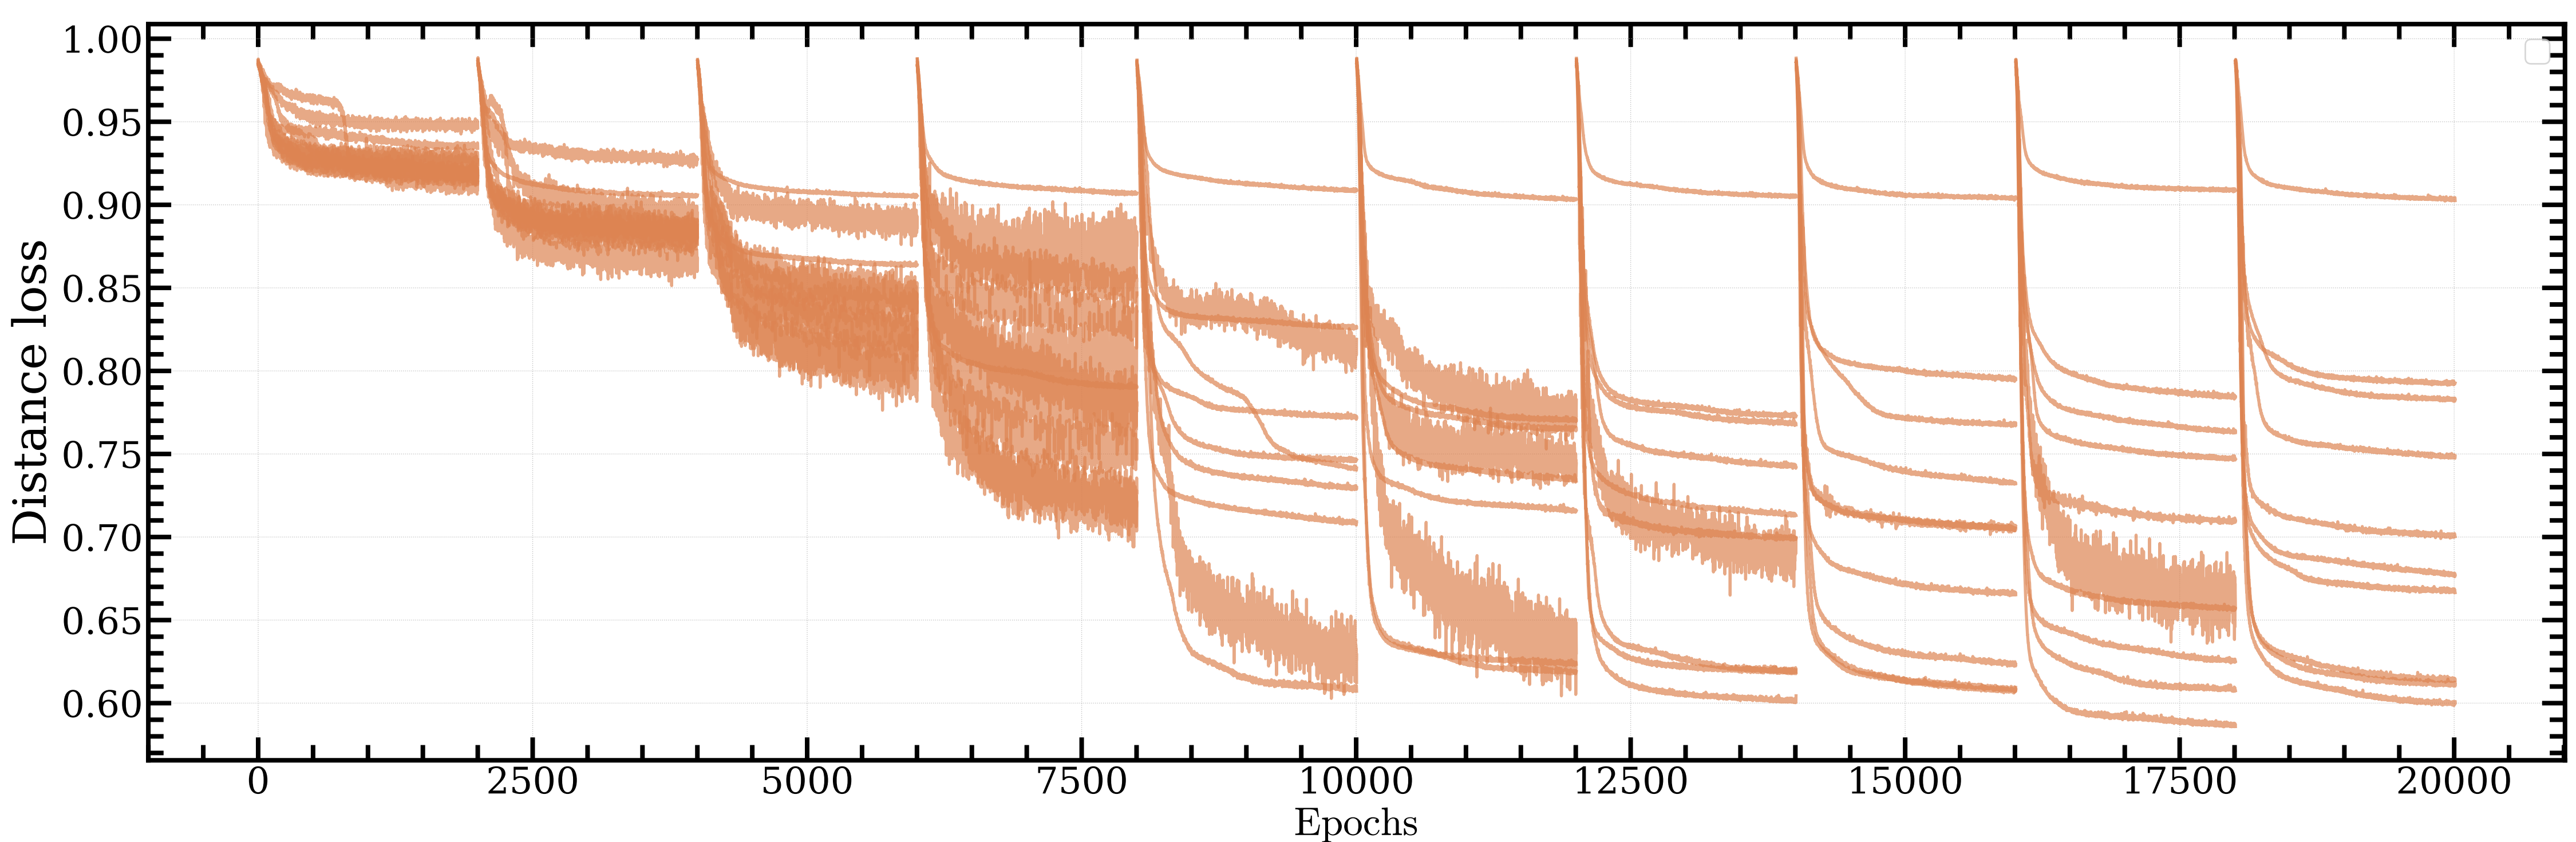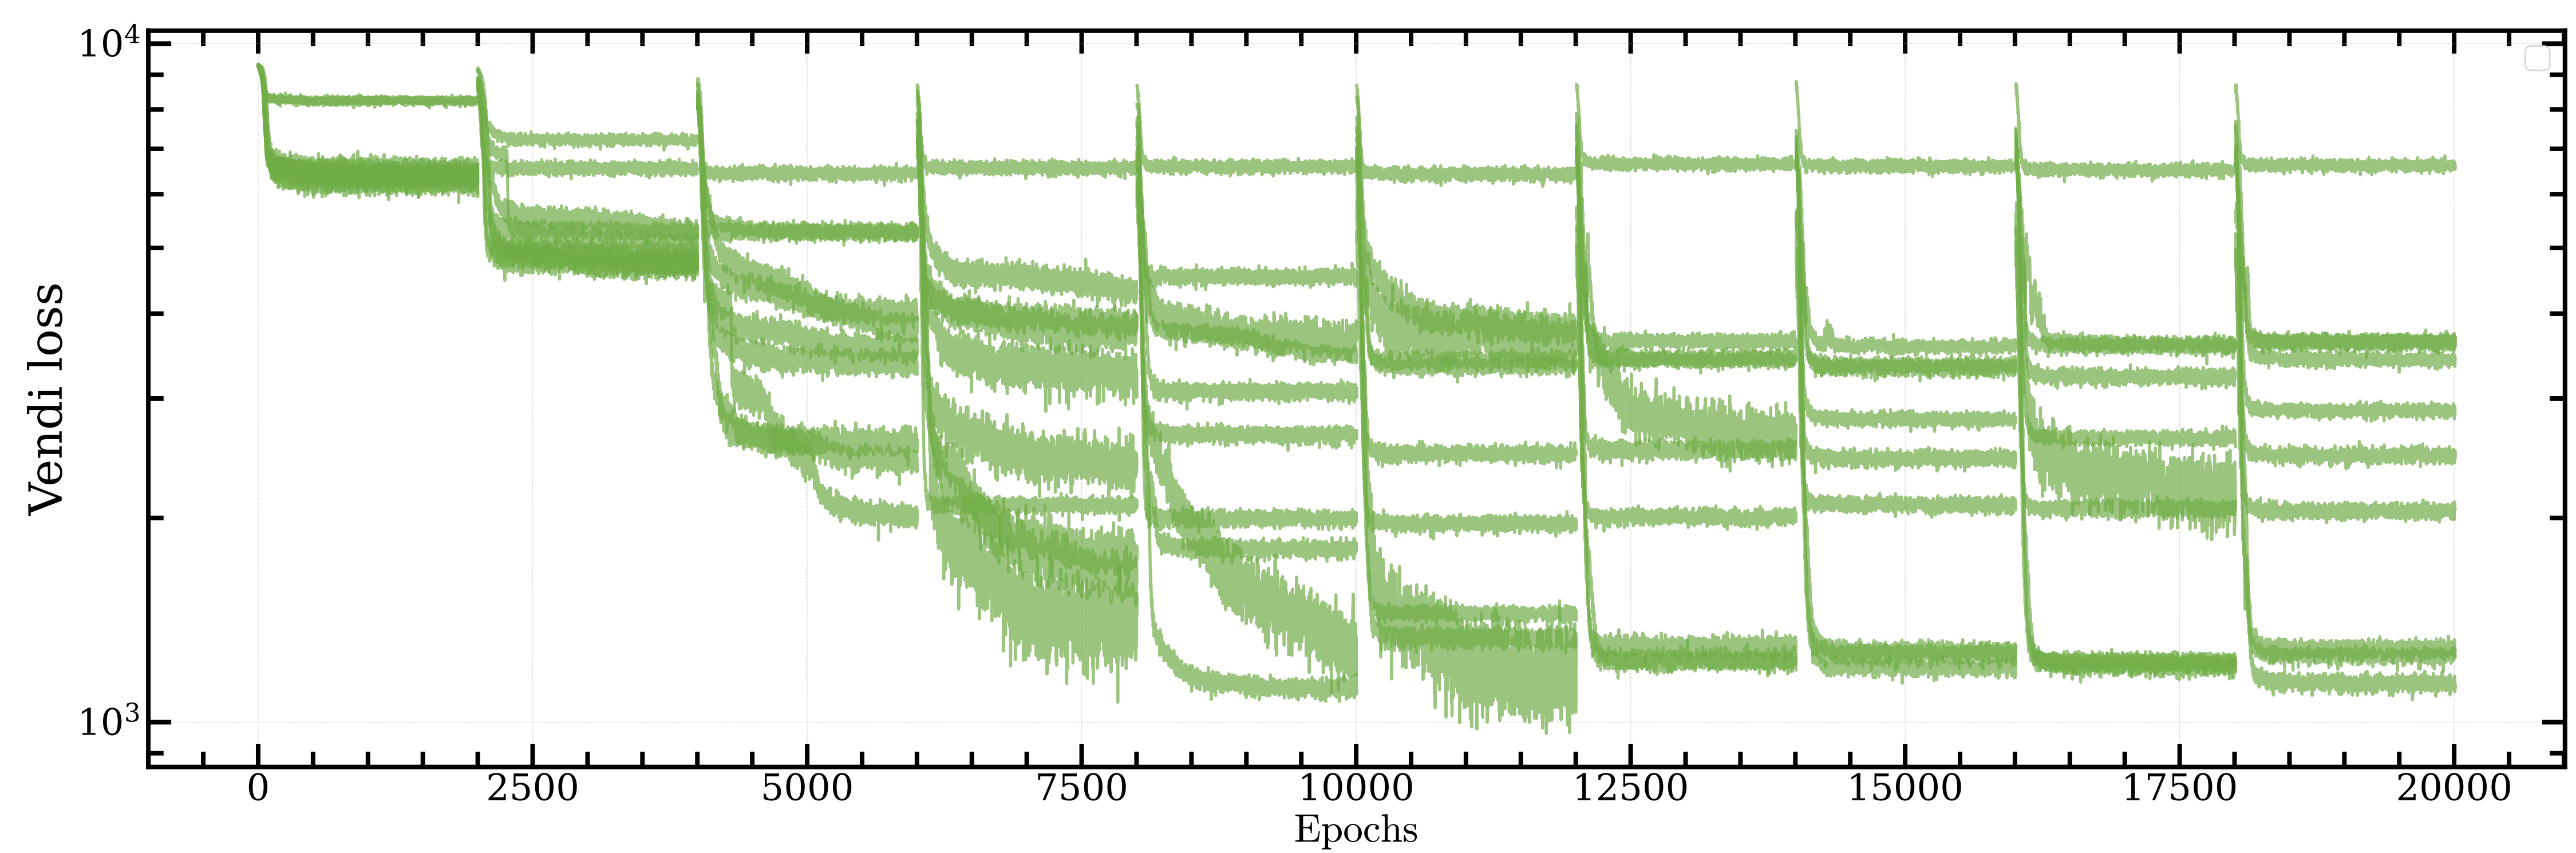

Supplement: supplementary_material [file eval_loss_qm9_atoms_7_rings_2_ryzcz_qubits_7_3_steps_10_wass_lays_20_in_product_dat_200_488_epoch_2001_100_lr_0.001_init_1.0_vd_0.0001.pdf › mpe_uap/results/demo_train_qm9/qm9_qubits_7_3_dat_488_200/figs_diff/eval_loss_qm9_atoms_7_rings_2_ryzcz_qubits_7_3_steps_10_wass_lays_20_in_product_dat_200_488_epoch_2001_100_lr_0.001_init_1.0_vd_0.0001.pdf]
